# Supplementary material for: Lactic Acid Fermentation to Re-cycle Apple By-Products for Wheat Bread Fortification
Source: PubMed Central journal article supplement (PMC6851242; doi:10.3389/fmicb.2019.02574), 2019-11-06
Supplement: Table_1.pdf [file Table_1.pdf]

1 **Table. S1.** Volume, color and crumb image analysis of bread manufactured with wheat flour fortified with apple by-products (ABP). Raw ABP  
2 (Raw-ABP), and chemically acidified ABP (CA-ABP) and Fermented-ABP, which were previously incubated at 30°C for 48 h. Fermentation  
3 (Fermented-ABP) was with the selected binary culture of *Weissella cibaria* PEP23F and *Saccharomyces cerevisiae* AN6Y19. Raw-ABP, CA-ABP  
4 and Fermented-ABP were added at concentrations of 5 and 10% (w w<sup>-1</sup> of flour). Baker's yeast wheat bread (BY), manufactured without addition of  
5 ABP, was the control. Data are the means ( $\pm$  SD) of three independent experiments analyzed in triplicate. Data were subjected to one-way ANOVA  
6 followed by Tukey's procedure at P < 0.05.

|                                                            | BY                           | Raw-ABP<br>(5% w w <sup>-1</sup> of<br>flour) | Raw-ABP<br>(10% w w <sup>-1</sup> of<br>flour) | CA-ABP (5%<br>w w <sup>-1</sup> of flour) | CA-ABP (10%<br>w w <sup>-1</sup> of flour) | Fermented-<br>ABP (5% w w <sup>-1</sup><br>of flour) | Fermented-<br>APB (10% w<br>w <sup>-1</sup> of flour) |
|------------------------------------------------------------|------------------------------|-----------------------------------------------|------------------------------------------------|-------------------------------------------|--------------------------------------------|------------------------------------------------------|-------------------------------------------------------|
| <b>Specific volume<br/>(cm<sup>3</sup> g<sup>-1</sup>)</b> | 2.48 $\pm$ 0.15 <sup>a</sup> | 2.14 $\pm$ 0.15 <sup>b</sup>                  | 2.12 $\pm$ 0.15 <sup>bc</sup>                  | 2.42 $\pm$ 0.12 <sup>a</sup>              | 2.00 $\pm$ 0.12 <sup>c</sup>               | 2.43 $\pm$ 0.23 <sup>ab</sup>                        | 2.08 $\pm$ 0.18 <sup>bc</sup>                         |
| <b>pH</b>                                                  | 5.91 $\pm$ 0.09 <sup>a</sup> | 5.36 $\pm$ 0.08 <sup>b</sup>                  | 4.96 $\pm$ 0.12 <sup>c</sup>                   | 4.72 $\pm$ 0.13 <sup>cd</sup>             | 4.23 $\pm$ 0.15 <sup>e</sup>               | 4.85 $\pm$ 0.15 <sup>c</sup>                         | 4.45 $\pm$ 0.14 <sup>de</sup>                         |
| <b>Crust color<br/>analysis</b>                            |                              |                                               |                                                |                                           |                                            |                                                      |                                                       |
| <i>dE<sub>ab</sub></i> *                                   | 34.7 $\pm$ 2.3 <sup>c</sup>  | 41.6 $\pm$ 1.8 <sup>ab</sup>                  | 44.8 $\pm$ 1.6 <sup>a</sup>                    | 36.9 $\pm$ 1.7 <sup>c</sup>               | 37.3 $\pm$ 1.8 <sup>c</sup>                | 38.8 $\pm$ 2.2 <sup>bc</sup>                         | 38.0 $\pm$ 1.8 <sup>c</sup>                           |
| <b>Crumb image<br/>analysis</b>                            |                              |                                               |                                                |                                           |                                            |                                                      |                                                       |
| Black pixel area<br>(%)                                    | 41.65 $\pm$ 1.6 <sup>b</sup> | 42.06 $\pm$ 1.0 <sup>b</sup>                  | 37.28 $\pm$ 1.1 <sup>c</sup>                   | 52.28 $\pm$ 1.7 <sup>a</sup>              | 44.38 $\pm$ 1.4 <sup>b</sup>               | 35.76 $\pm$ 0.8 <sup>c</sup>                         | 31.22 $\pm$ 0.5 <sup>d</sup>                          |

7 <sup>a-c</sup> Means within the row with different letters are significantly different (P < 0.05).

8  
9  
10  
11  
12
