# Supplementary material for: Lactic Acid Fermentation to Re-cycle Apple By-Products for Wheat Bread Fortification
Source: PubMed Central journal article supplement (PMC6851242; doi:10.3389/fmicb.2019.02574), 2019-11-06
Supplement: Table_3.pdf [file Table_3.pdf]

1 **Table S3.** Mold contamination during 14 days of incubation at room temperature of bread slices manufactured with wheat flour fortified with apple  
 2 by-products (ABP). Raw ABP (raw-ABP), and chemically acidified ABP (CA-ABP) and ABP-fermented, which were previously incubated at 30°C  
 3 for 48 h. Fermentation (ABP-fermented) was with the selected binary culture of *Weissella cibaria* PEP23F and *Saccharomyces cerevisiae* AN6Y19.  
 4 Raw-, CA- and Fermented-ABP were added at concentrations of 5 and 10% (w w<sup>-1</sup> of flour). Baker's yeast wheat bread (BY), manufactured without  
 5 addition of ABP, was the control. Data are the means (± SD) of three independent experiments analyzed in triplicate. Data were subjected to one-  
 6 way ANOVA followed by Tukey's procedure at P < 0.05.

| Moulds contamination (%)* |      |                                         |                                          |                                        |                                         |                                               |                                                |
|---------------------------|------|-----------------------------------------|------------------------------------------|----------------------------------------|-----------------------------------------|-----------------------------------------------|------------------------------------------------|
| Storage (days)            | BY   | Raw-ABP (5% w w <sup>-1</sup> of flour) | Raw-ABP (10% w w <sup>-1</sup> of flour) | CA-ABP (5% w w <sup>-1</sup> of flour) | CA-ABP (10% w w <sup>-1</sup> of flour) | Fermented-ABP (5% w w <sup>-1</sup> of flour) | Fermented-APB (10% w w <sup>-1</sup> of flour) |
| 11                        | –    | –                                       | –                                        | –                                      | –                                       | –                                             | –                                              |
| 12                        | +    | +                                       | +                                        | +                                      | +                                       | +                                             | +                                              |
| 13                        | +    | +                                       | ++                                       | +                                      | +                                       | +                                             | +                                              |
| 14                        | ++++ | ++++                                    | +++++                                    | ++++                                   | +++                                     | +++                                           | +                                              |

7 \*Contamination was determined as the percentage of the surface covered by the visible micelia of molds, scored as follows: –, 0% contamination of  
 8 the slice surface; +, 1–5% contamination of the slice surface; ++, 6–10 % contamination of the slice surface; +++, 11–20 % contamination of the  
 9 slice surface; +++++, 21–30% contamination of the slice surface; ++++++, 31 – 40% contamination of the slice surface.

10
